# Supplementary material
Source: PubMed Central journal article supplement (PMC6026222)
Supplement: mmc1.pdf [file mmc1.pdf]

## Physician Assessment of Pretest Probability of Malignancy and Adherence With Guidelines for Pulmonary Nodule Evaluation

*Nichole T. Tanner, MD, MSCR, FCCP; Alexander Porter, MD; Michael K. Gould, MD, FCCP; Xiao-Jun Li, PhD; Anil Vachani, MD, FCCP; and Gerard A. Silvestri, MD, FCCP*

CHEST 2017; 152(2):263-270

*Online supplements are not copyedited prior to posting and the author(s) take full responsibility for the accuracy of all data.*

## e-Appendix 1: Prediction model equations

### Model Equations

---

Probability of a malignant nodule =  $e^x / (1 + e^x)$

#### Where for the VA Model

---

$x = -8.404 + (0.779 * \text{age}/10) + (2.061 * \text{smoking status}) + (0.112 * \text{nodule diameter}) - (0.567 * \text{yearsquit}/10)$

age/10 = age in years divided by 10;

smoking status = 1 if patient is current or former smoker, otherwise 0;

nodule diameter = largest nodule diameter in mm;

spiculation = 1 if the nodule was spiculated, 0 otherwise;

yearsquit/10 = number of years since quitting smoking divided by 10, 0 if not applicable

#### Where for the Mayo Model

---

$x = -6.8272 + (0.0391 * \text{age}) + (0.7917 * \text{smoking status}) + (1.3388 * \text{cancer}) + (0.1274 * \text{nodule diameter}) + (1.0407 * \text{spiculation}) + (0.7838 * \text{lobe location})$

and

age = age in years;

smoking status = 1 if patient is current or former smoker, otherwise 0;

cancer history = 1 if the patient has a history of extrathoracic cancer 5 years or more before nodule detection, 0 if no or not specified;

Patients with a more recent history of cancer or a history of lung cancer were excluded from a Mayo analysis;

nodule diameter = largest nodule diameter in mm;

spiculation = 1 if the nodule was spiculated, 0 otherwise;

lobe location = 1 if the nodule was located in an upper lobe, 0 otherwise.

---

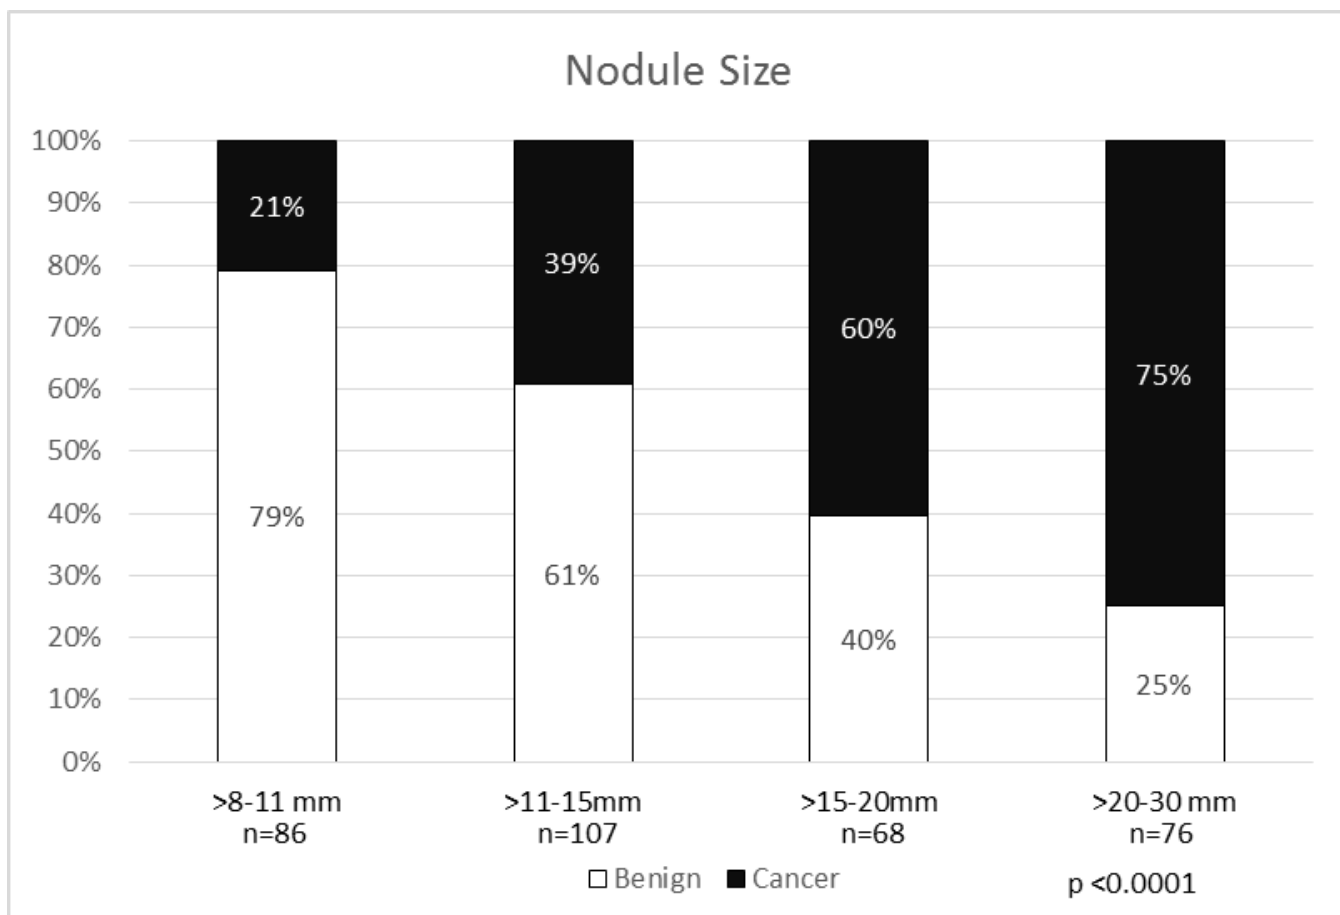

**e-Figure 1:** Diagnostic outcome by nodule size

**e-Table 1:** Physician assessment and model agreement overall and stratified by diagnosis

| Physician/VA |          | Overall |    | Cancer |     | Benign |    |
|--------------|----------|---------|----|--------|-----|--------|----|
|              |          | n       | %  | n      | %   | n      | %  |
| 00-05%       | Agree    | 2       | 8  | 0      | 0   | 2      | 9  |
|              | Disagree | 23      | 92 | 3      | 100 | 20     | 91 |
| 05-60%       | Agree    | 139     | 80 | 29     | 71  | 110    | 83 |
|              | Disagree | 35      | 20 | 12     | 29  | 23     | 17 |
| 60-100%      | Agree    | 76      | 55 | 68     | 60  | 8      | 33 |
|              | Disagree | 62      | 45 | 46     | 40  | 16     | 67 |

  

| Physician/Mayo* |          | Overall |    | Cancer |     | Benign |    |
|-----------------|----------|---------|----|--------|-----|--------|----|
|                 |          | n       | %  | n      | %   | n      | %  |
| 00-05%          | Agree    | 2       | 8  | 0      | 0   | 2      | 10 |
|                 | Disagree | 22      | 92 | 3      | 100 | 19     | 90 |
| 05-60%          | Agree    | 152     | 89 | 35     | 85  | 117    | 91 |
|                 | Disagree | 18      | 11 | 6      | 15  | 12     | 9  |
| 60-100%         | Agree    | 57      | 44 | 52     | 49  | 5      | 22 |
|                 | Disagree | 73      | 56 | 55     | 51  | 18     | 78 |

\*Mayo model applied as described in original paper and subsequent publications patients with cancer history < 5 years prior were removed from analysis. (N=324)

**e-Table 2:** VA Model risk assessment and guideline concordance

| VA Model Pre-Test Probability $\leq$ 5%           |                  |                    |                     |
|---------------------------------------------------|------------------|--------------------|---------------------|
|                                                   | All<br>n=5 (%)   | Cancer<br>n=0 (%)  | Benign<br>n=5 (%)   |
| Guideline concordant<br>CT surveillance           | 3 (60.0)         | N/A                | 3 (60.0)            |
| More Aggressive                                   | 2 (40.0)         | N/A                | 2 (40.0)            |
| PET                                               | 2 (40.0)         | N/A                | 2 (40.0)            |
| PET $\leq$ 30d before<br>Surgery                  | 0 (0.0)          | N/A                | 0 (0.0)             |
| Biopsy                                            | 0 (0.0)          | N/A                | 0 (0.0)             |
| VA Model Pre-Test Probability $>$ 5% & $\leq$ 60% |                  |                    |                     |
|                                                   | All<br>n=221 (%) | Cancer<br>n=76 (%) | Benign<br>n=145 (%) |
| Guideline concordant<br>PET or Biopsy             | 111 (50.2)       | 49 (64.5)          | 62 (42.8)           |
| More Aggressive                                   | 27 (12.2)        | 19 (25.0)          | 8 (5.5)             |
| PET $\leq$ 30d before<br>Surgery                  | 23 (10.4)        | 18 (23.7)          | 5 (3.4)             |
| Surgery                                           | 4 (1.8)          | 1 (1.3)            | 3 (2.1)             |
| More Conservative                                 | 83 (37.6)        | 8 (10.5)           | 75 (51.7)           |
| CT                                                | 83 (37.6)        | 8 (10.5)           | 75 (51.7)           |
| VA Model Pre-Test Probability $\geq$ 60%          |                  |                    |                     |
|                                                   | All<br>n=111 (%) | Cancer<br>n=82 (%) | Benign<br>n=29 (%)  |
| Guideline concordant<br>Surgery*                  | 24 (21.6)        | 23 (28.0)          | 1 (3.4)             |
| More Conservative                                 | 87 (78.4)        | 59 (72.0)          | 28 (96.6)           |
| CT                                                | 10 (9.0)         | 4 (4.9)            | 6 (20.7)            |
| PET*                                              | 64 (57.7)        | 45 (54.9)          | 19 (65.5)           |
| Biopsy                                            | 13 (11.7)        | 10 (12.2)          | 3 (10.3)            |

PET performed within 30 days of surgery was considered a staging PET scan and concordant with guidelines

**e-Table 3:** Mayo Model risk assessment and guideline concordance

| Mayo Model Pre-Test Probability $\leq$ 5%           |                  |                    |                     |
|-----------------------------------------------------|------------------|--------------------|---------------------|
|                                                     | All<br>n=4 (%)   | Cancer<br>n=0 (%)  | Benign<br>n=4 (%)   |
| Guideline concordant CT surveillance                | 2 (50.0)         | N/A                | 2 (50.0)            |
| More Aggressive                                     | 2 (50.0)         | N/A                | 2 (50.0)            |
| Pet                                                 | 1 (25.0)         | N/A                | 1 (25.0)            |
| PET $\leq$ 30d before Surgery                       | 0 (0.0)          | N/A                | 0 (0.0)             |
| Biopsy                                              | 1 (25.0)         | N/A                | 1 (25.0)            |
| Mayo Model Pre-Test Probability $>$ 5% & $\leq$ 60% |                  |                    |                     |
|                                                     | All<br>n=246 (%) | Cancer<br>n=93 (%) | Benign<br>n=153 (%) |
| Guideline concordant PET or Biopsy                  | 131 (53.3)       | 60 (64.5)          | 71 (46.4)           |
| More Aggressive                                     | 30 (12.2)        | 23 (24.7)          | 7 (4.6)             |
| PET $\leq$ 30d before Surgery                       | 25 (10.2)        | 20 (21.5)          | 5 (3.3)             |
| Surgery                                             | 5 (2.0)          | 3 (3.2)            | 2 (1.3)             |
| More Conservative                                   | 85 (34.6)        | 10 (10.8)          | 75 (49.0)           |
| CT                                                  | 85 (34.6)        | 10 (10.8)          | 75 (49.0)           |
| Mayo Model Pre-Test Probability $\geq$ 60%          |                  |                    |                     |
|                                                     | All<br>n=74 (%)  | Cancer<br>n=58 (%) | Benign<br>n=16 (%)  |
| Guideline concordant Surgery*                       | 18 (24.3)        | 17 (29.3)          | 1 (6.3)             |
| More Conservative                                   | 56 (75.7)        | 41 (70.7)          | 15 (93.8)           |
| CT                                                  | 4 (5.4)          | 2 (3.4)            | 2 (12.5)            |
| PET*                                                | 45 (60.8)        | 34 (58.6)          | 11 (68.8)           |
| Biopsy                                              | 7 (9.5)          | 5 (8.6)            | 2 (12.5)            |

\*PET performed within 30 days of surgery was considered a staging PET scan and concordant with guideline
